# Supplementary material for: Potential role of glucosamine-phosphate N-acetyltransferase 1 in the development of lung adenocarcinoma
Source: publisher site journal article supplement (doi:10.18632/aging.202604), 2021-03-03
Supplement: Supplementary file [file aging-v13i5-202604-supplementary-material-SD1.pdf]

SUPPLEMENTARY FIGURES

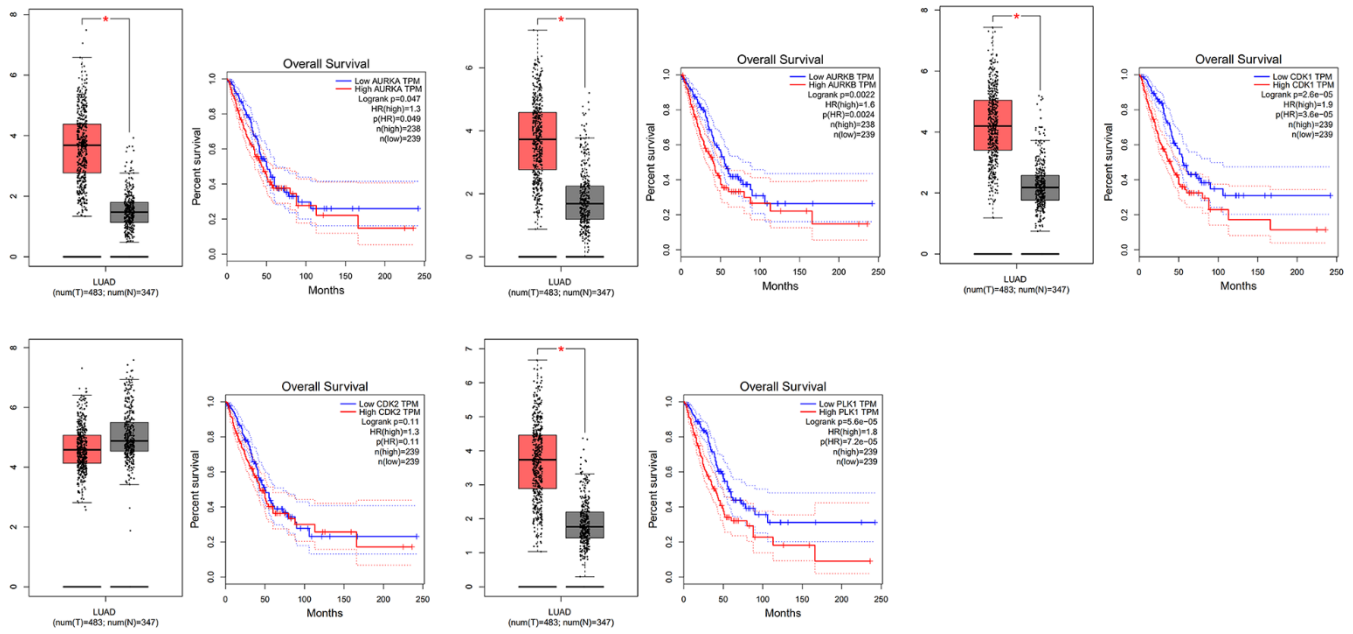

Supplementary Figure 1. The expression and survival outcome of *GNPAT1*-associated top five most significant kinase in LUAD.

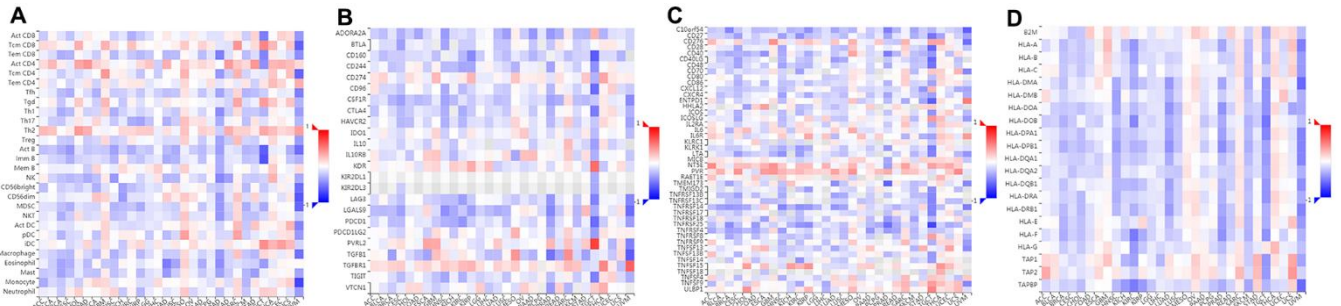

Supplementary Figure 2. The relationship between *GNPAT1* expression and immune cells, immunomodulators across different cancers. (A) *GNPAT1* expression correlated with immune cells infiltration level across different cancer types. (B) *GNPAT1* expression correlated with immunoinhibitors across different cancer types. (C) *GNPAT1* expression correlated with immunostimulators across different cancer types. (D) *GNPAT1* expression correlated with MHC molecules across different cancer types.

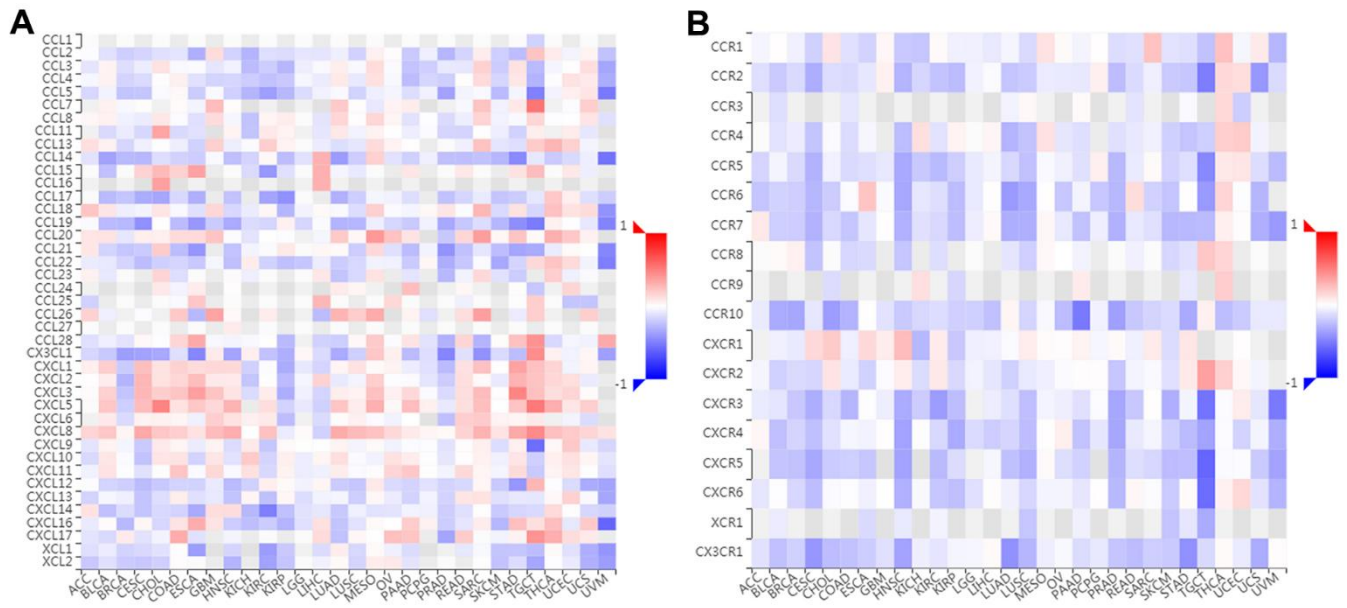

**Supplementary Figure 3. The relationship between *GNPNAT1* expression and chemokines across different cancers.** (A) *GNPNAT1* expression correlated with chemokines across different cancer types. (B) *GNPNAT1* expression correlated with chemokine receptors across different cancer types.
